# Supplementary material
Source: HighWire-hosted journal article supplement (https://gut.bmj.com/content/71/5/928)
Supplement: inline-supplementary-material-3 [file inline-supplementary-material-3.pdf]

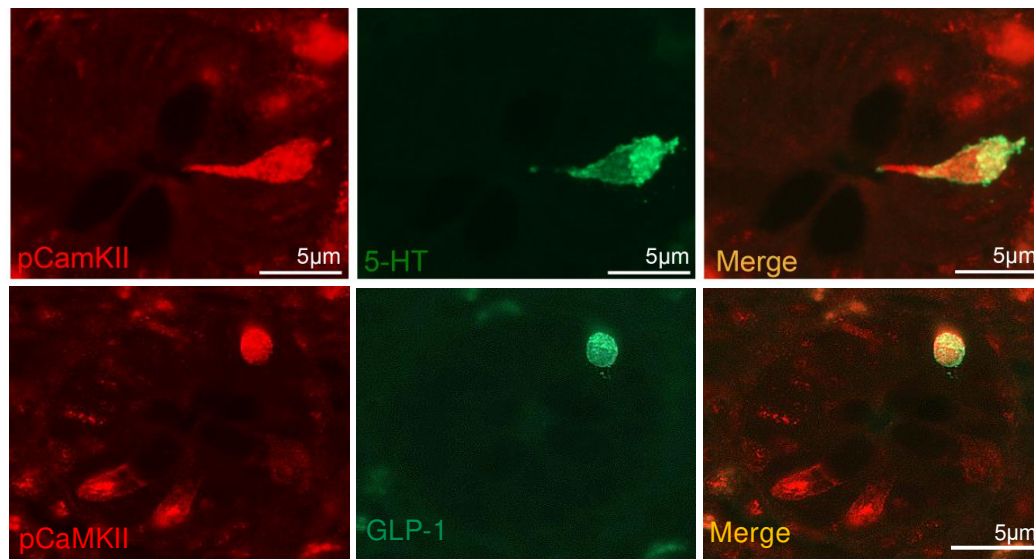

**Supplementary Figure 2: Stimulation with FFAR4 TUG891 induces pCaMKII expression in GLP-1 containing L-cells and 5-HT containing EC cells.**

- A. Human colonic mucosa stimulated with TUG891 (10 µM) leads to co-expression of pCaMKII and EC cells.
- B. Human colonic mucosa stimulated with TUG891 (10 µM) leads to co-expression of pCaMKII and L-cells.
