# Supplementary material
Source: HighWire-hosted journal article supplement (https://gut.bmj.com/content/71/5/928)
Supplement: inline-supplementary-material-6 [file inline-supplementary-material-6.pdf]

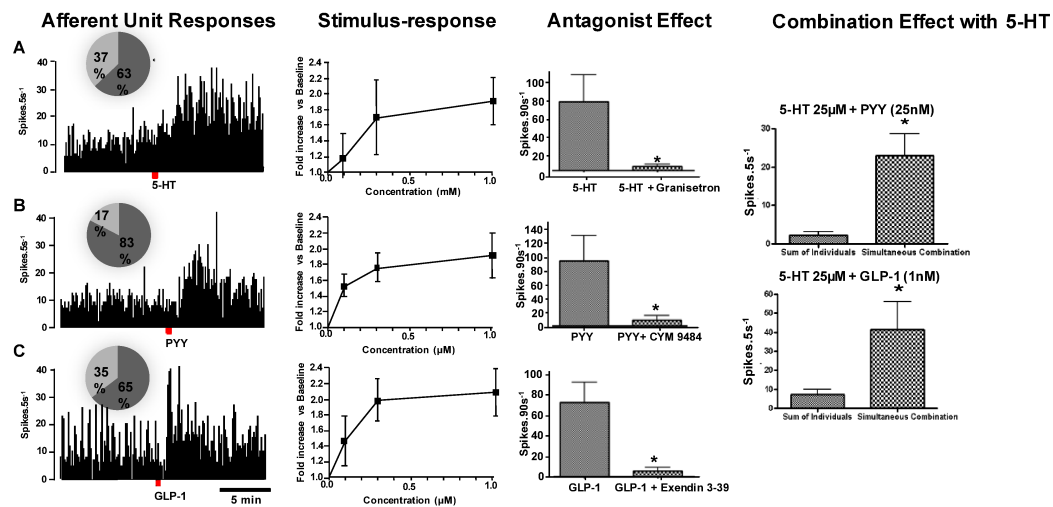

**Supplementary Figure 5: 5-HT, PYY and GLP-1 – evoked responses in individual afferent fibres.**

- A. The 5-HT<sub>3</sub> receptor antagonist Granisetron (1μM) significantly inhibits response to 5-HT (300μM): N=7,  $p=0.035$ .
- B. The Y<sub>2</sub> receptor antagonist CYM 9484 (2μM) significantly inhibits response to PYY 300nM. N =6,  $p=0.04$ .
- C. GLP-1 response was significantly inhibited by the GLP-1 receptor antagonist Exendin 3-39 (100nM). N=8,  $p=0.04$ .

Responses to these agonists were concentration-dependent, and subthreshold concentrations of PYY (25nM) or GLP-1 (25nM) administered simultaneously caused significant activation compared to the individual responses added together (N=7,  $p=0.006$  and 0.04, respectively).
